# Supplementary material for: Subcellular functions of tau mediates repair response and synaptic homeostasis in injury
Source: Research Square preprint supplement (doi:10.21203/rs.3.rs-3897741/v1), 2024-02-29
Supplement: Supplementary file 1 [file ChIP-Seq Dataset.docx]

| **2 hr/control Up and Downregulated genes** | |
| --- | --- |
| **Gene List** | **Log2FC Radiated_2hr/Control** |
| GRIN2C, FDXR | 2.14578625 |
| PANDAR, CDKN1A, LOC105375039, RAB44 | 2.041912204 |
| AEN, ISG20 | 1.886456375 |
| SAE1, BBC3, MIR3190, MIR3191 | 1.813433451 |
| SESN2 | 1.703445066 |
| PHLDA3 | 1.512776812 |
| PANDAR, CDKN1A, LOC105375039 | 1.491762542 |
| MDM2, CPM | 1.339614934 |
| IARS | 1.316835994 |
| RNF187 | 1.268590651 |
| TPT1, SNORA31, TPT1-AS1 | 1.266519231 |
| PANDAR, CDKN1A | 1.265494689 |
| LINC01136, BTG2 | 1.214794056 |
| CEBPB-AS1, CEBPB | 1.190813704 |
| BBC3, MIR3190, MIR3191 | 1.175145435 |
| BBC3, MIR3190, MIR3191 | 1.1644198 |
| VEGFA, LOC105375070 | 1.115365417 |
| C9orf163, NOTCH1 | 1.076192895 |
| KDELR2 | 1.068138989 |
| ARHGEF2 | 1.052059024 |
| FAM118B, SRPR, FOXRED1 | 1.045024049 |
| KMT2A, LOC101929089 | 1.035551211 |
| NXPH4, SHMT2, NDUFA4L2 | 1.032733088 |
| DDIT4 | 1.013414092 |
| RLF, TMCO2 | 1.007961592 |
| XPOT | 0.979382707 |
| POFUT2 | 0.979324431 |
| LOC105378927 | 0.975009284 |
| ABCB9 | 0.972211421 |
| SEC16A, C9orf163 | 0.971426171 |
| ITGA2B, GPATCH8 | 0.930563391 |
| SERPINH1, LOC105369390, LOC105369391 | 0.929125898 |
| PLK3, TCTEX1D4, BTBD19, PTCH2 | 0.918335967 |
| SEC61A1, RUVBL1, RUVBL1-AS1 | 0.914216952 |
| HSD11B1L, RPL36, LONP1, LOC105372254 | 0.902520707 |
| SRRM2, TCEB2 | 0.88983361 |
| POLH, GTPBP2 | 0.88798566 |
| DDB2, ACP2, NR1H3 | 0.880191424 |
| MARS, MIR6758, DDIT3, MIR616, MBD6 | 0.878440509 |
| LOC105372088 | 0.878327844 |
| GART, SON, MIR6501 | 0.870784231 |
| ARFGAP1, MIR4326, COL20A1 | 0.86102451 |
| PGPEP1 | 0.855172042 |
| KIAA1324, SARS | 0.852687237 |
| FAM212B, FAM212B-AS1, LOC101928718 | 0.849238792 |
| ZNF79, RPL12, SNORA65, LRSAM1 | 0.848204857 |
| EP300, EP300-AS1 | 0.845114398 |
| MED29, ZFP36, MIR4530, TRI-TAT1-1, PLEKHG2 | 0.841174004 |
| METRNL | 0.834103069 |
| BMF | 0.832688811 |
| RABEPK, HSPA5, GAPVD1 | 0.829747743 |
| CCDC117, XBP1, ZNRF3 | 0.825926277 |
| BBC3, MIR3190, MIR3191 | 0.820731588 |
| CHD2 | 0.819629906 |
| LOC400499 | 0.816878698 |
| GPX4, SBNO2 | 0.81676293 |
| ATF3 | 0.816061617 |
| HERPUD1 | 0.813886975 |
| TMEM230, PCNA, PCNA-AS1, CDS2 | 0.810506806 |
| LOC105372240, OAZ1, C19orf35 | 0.80598312 |
| NIM1K, HMGCS1 | 0.797117538 |
| ANKHD1-EIF4EBP3, EIF4EBP3, SRA1, APBB3, MIR6831, SLC35A4 | 0.785459191 |
| DAPK3, EEF2, SNORD37 | 0.782234049 |
| TM7SF2, ZNHIT2, FAU, MRPL49, SYVN1, MIR6751 | 0.778266923 |
| SARS, CELSR2 | 0.776905054 |
| NDUFAF6, TP53INP1 | 0.776298774 |
| POLH, GTPBP2, MAD2L1BP | 0.774729052 |
| SPG7, RPL13, SNORD68, CPNE7 | 0.766423235 |
| PGPEP1 | 0.762092299 |
| BEST1, FTH1, LOC399900 | 0.761618885 |
| LMNA | 0.761331464 |
| IRS2 | 0.758914567 |
| SPTY2D1, LOC105376578 | 0.758723733 |
| ZNF672, ZNF692, LOC105373317 | 0.752463607 |
| SEC31A | 0.750815935 |
| JUP | -0.763299742 |
| ENC1 | -0.803713933 |
| ZIC2, LINC00554 | -0.813114419 |
| LINC00461, MIR9-2 | -0.866531958 |
| EFNB3, DNAH2 | -0.875599577 |
| TPM1 | -0.945242281 |
| RAB25, MEX3A | -0.946208078 |
| LINC00461, MIR9-2 | -0.949919816 |
| SENP2, IGF2BP2 | -0.96553156 |
| CRB2, DENND1A | -0.968137549 |
| TPM1 | -0.974336369 |
| EMX2OS, EMX2 | -0.995048429 |
| TPM1 | -1.022459928 |
| LOC221946, ACTB | -1.042826145 |
| LOC105371928, ACTG1, FSCN2 | -1.049184522 |
| UBALD1, MGRN1 | -1.096373086 |
| SOCS3, LOC101928674 | -1.099513301 |
| LOC221946, ACTB | -1.237321746 |
| CTGF | -1.277545347 |
| LOC105369555, LOC338667, CDON | -1.418979026 |
| TPM1 | -1.431940356 |
| NAV1, IPO9-AS1, IPO9 | -1.496918875 |

| **24 hr/control Up and Downregulated genes** | |
| --- | --- |
| **Gene List** | **Log2FC Radiated_24hr/Control** |
| FAM222A | 3.530261471 |
| LINC00599, MIR124-1 | 2.610178028 |
| ENDOV | 2.552932013 |
| NFIC | 2.503481207 |
| DRAXIN | 2.320138445 |
| PPARGC1A | 2.187290059 |
| LOC105370693 | 2.170244829 |
| GRIN2C, FDXR | 2.001002638 |
| SORCS2 | 1.959839298 |
| WBSCR17 | 1.848783995 |
| KDM4B | 1.800833213 |
| ADAMTS13, CACFD1, SLC2A6 | 1.645416222 |
| GSE1, LOC105371386 | 1.621750588 |
| COG6 | 1.605655479 |
| GDF15, MIR3189, LRRC25 | 1.600248227 |
| PANDAR, CDKN1A, LOC105375039, RAB44 | 1.590841308 |
| PWWP2B | 1.538753638 |
| FOXO6, LOC101929901 | 1.536112053 |
| PLCH2 | 1.532674979 |
| AFAP1 | 1.489038081 |
| PANDAR, CDKN1A, LOC105375039 | 1.465831805 |
| TOX2 | 1.449976456 |
| PLXNB2 | 1.448620623 |
| MIR9-3, LINC00925 | 1.390802469 |
| SAE1, BBC3, MIR3190, MIR3191 | 1.390296933 |
| NRP1 | 1.372025221 |
| ADGRB2, MIR4254 | 1.370938855 |
| VWCE, DDB1 | 1.306412568 |
| PHLDA3 | 1.293138896 |
| LOC102724957 | 1.258317908 |
| PHLDA3 | 1.247905587 |
| EDN2 | 1.244723987 |
| NFIC | 1.241478262 |
| LOC101927910, MC1R, TUBB3 | 1.222716138 |
| LOC100128239, LOC105369582 | 1.202014647 |
| THRA | 1.18910472 |
| HNRNPKP3 | 1.179506608 |
| HK1 | 1.179367007 |
| LOC105375591, INSIG1 | 1.162371186 |
| COL1A1 | 1.159206008 |
| RIN1, BRMS1, B4GAT1, LOC102724064 | 1.144366989 |
| GSE1 | 1.144186654 |
| SS18L1, MTG2 | 1.143307469 |
| FDPS, LOC105371451, RUSC1-AS1, RUSC1 | 1.129422267 |
| FBXL18 | 1.128272364 |
| LINC00461, LOC105379071 | 1.122148216 |
| SIPA1L3, DPF1 | 1.108108427 |
| FSCN1 | 1.107423903 |
| IER5 | 1.10166264 |
| DAPK3, MIR637 | 1.079204787 |
| MAPK11, PLXNB2 | 1.062568662 |
| DNAJB1, TECR | 1.05129256 |
| ABCB9 | 1.04882241 |
| AHDC1 | 1.039645617 |
| FOXG1-AS1, FOXG1 | 1.039519296 |
| FAM212B, FAM212B-AS1, LOC101928718 | 1.036849159 |
| BCL11A | 1.0367466 |
| IRS2 | 1.026967048 |
| SPG7, RPL13, SNORD68 | 1.014293456 |
| LOC100505942, FAM65A | 1.01019959 |
| LOC105372240, OAZ1, C19orf35 | 1.005448251 |
| MPC1 | 1.002890208 |
| G3BP2 | 1.001929375 |
| LOC105369930, LOC105369929 | -1.00885038 |
| MAP2 | -1.014861619 |
| SHB | -1.021977583 |
| SLC14A2 | -1.022925205 |
| LOC105369555, LOC338667, CDON | -1.025527183 |
| LOC101927383 | -1.026360587 |
| LOC105376859, ID3 | -1.028744489 |
| AUTS2 | -1.031240243 |
| CDK14 | -1.035794351 |
| LDLRAD3 | -1.039112412 |
| GJA1 | -1.042450846 |
| EMX2OS, EMX2 | -1.045063606 |
| LOC105374600 | -1.045076472 |
| MAF | -1.049932069 |
| LOC100507065 | -1.054840566 |
| PKHD1, LOC105375086 | -1.056528509 |
| LDLRAD3 | -1.066528077 |
| ZIC2, LINC00554 | -1.077989865 |
| CADPS | -1.084804259 |
| LOC100128233 | -1.087847327 |
| ANO1, LOC105369372 | -1.09953894 |
| MSI2 | -1.10420075 |
| NFIA | -1.10825862 |
| EPHB1 | -1.109929443 |
| PLEKHM3 | -1.117440068 |
| CASC2 | -1.118172145 |
| TOX | -1.119740151 |
| DPYD, DPYD-AS1 | -1.122652826 |
| ACOX2 | -1.124274274 |
| LOC105369555, LOC338667, CDON | -1.136116831 |
| DIRC3 | -1.138586628 |
| ZNF436 | -1.141144052 |
| ITSN1 | -1.142942514 |
| TLE1 | -1.15026207 |
| WNT7A | -1.161511621 |
| KCNMA1 | -1.162180622 |
| TMEM260, LOC105370515 | -1.168179888 |
| ATP8A2 | -1.178392486 |
| TENM2 | -1.180231834 |
| LOC105379082 | -1.180287483 |
| SOX6 | -1.187238505 |
| TRAM2 | -1.195881896 |
| SHROOM3 | -1.214914979 |
| ATP10B | -1.216543499 |
| PRUNE2 | -1.218869715 |
| ADGRL3 | -1.219646557 |
| WLS | -1.228315146 |
| SEMA6A | -1.244212214 |
| OR5A2 | -1.245925691 |
| LOC105370504 | -1.251589187 |
| ADGRL3 | -1.266183965 |
| MIR135A2 | -1.271538423 |
| VIM-AS1, VIM | -1.272262653 |
| DENND1A | -1.275121447 |
| FZD8, MIR4683, LOC105376494 | -1.291414754 |
| LOC102723512 | -1.298902228 |
| MIR100HG | -1.29950779 |
| LOC105378027 | -1.301668793 |
| LINC00922 | -1.303828592 |
| UNQ6494, LOC102724237 | -1.304419266 |
| QKI | -1.305756875 |
| EFEMP1 | -1.306349448 |
| RMST | -1.313703939 |
| RAB11FIP1 | -1.314265834 |
| HMGA2 | -1.314411396 |
| LRRC1, LOC105375096 | -1.326445005 |
| LOC101927902, LINC01004 | -1.329229205 |
| LOC101927960 | -1.331514144 |
| ZFHX4 | -1.334931827 |
| EFNB2 | -1.336650001 |
| TRIM2 | -1.338019065 |
| SDC2 | -1.343064364 |
| LOC105375677 | -1.35598451 |
| NUAK1 | -1.370471453 |
| GNG12-AS1, WLS | -1.37299618 |
| NAV1, IPO9-AS1 | -1.373095387 |
| LOC102724934 | -1.378763947 |
| RNA5SP362 | -1.389239633 |
| CDK15 | -1.389746302 |
| IMMP2L | -1.390617134 |
| LOC105371357, LOC102724084 | -1.391594551 |
| LPAR1 | -1.391690914 |
| CLEC19A | -1.40680935 |
| MUC1, MIR92B, LOC105371450, THBS3, MTX1 | -1.425553864 |
| GAREM | -1.425896015 |
| NAV1, IPO9-AS1, IPO9 | -1.431202222 |
| LHFP | -1.434487874 |
| DUSP6, LOC105369889 | -1.435661516 |
| TAF4B | -1.439888748 |
| LOC152578 | -1.478860613 |
| SUCLG1 | -1.480303766 |
| GLIS3 | -1.480453634 |
| RERE | -1.502895005 |
| TNIK | -1.512785772 |
| IL17RD | -1.518615661 |
| GLIS3 | -1.544775034 |
| LOC105378505 | -1.56052684 |
| LOC105376107 | -1.580322114 |
| RNA5SP362 | -1.584962501 |
| ABHD6 | -1.61973645 |
| LOC105375862, LOC105375861 | -1.627547737 |
| EMX2OS, EMX2 | -1.688754534 |
| LOC105379108 | -1.716207034 |
| GAS1, LOC102724090, LOC100506834 | -1.723566906 |
| ELP4, LOC105369286 | -1.737591696 |
| MCC | -1.7832526 |
| GJA1 | -1.826021835 |
| LINC01592 | -1.839496077 |
| EDNRB-AS1 | -1.853383453 |
| CRB2, DENND1A | -1.882046685 |
| UIMC1, ZNF346 | -2.003917005 |
| ADGRV1 | -2.029938008 |
| LOC105376124 | -2.097796361 |
| LOC105373890, MIR4268 | -2.179940525 |
| WNT8B, LOC105378452, SEC31B | -2.254035359 |
