# Supplementary material for: Subcellular functions of tau mediates repair response and synaptic homeostasis in injury
Source: Research Square preprint supplement (doi:10.21203/rs.3.rs-3897741/v1), 2024-02-29
Supplement: Supplementary file 2 [file IP-MS Dataset.docx]

| **2 hr radiated_unradiated control - Upregulated** | |
| --- | --- |
| **Accession** | **Description** |
| Q05639  Q6PEY2  P62979  B4DY09  B4DY08  P27816-5  P19338  P16104  P35900  Q9H1E3  P62913  H0YAS8  P25398  J3QSU6  Q9HD64  Q9Y6M1  Q02413  Q14152  P04075  P01009  P00338  C9J0E4  A0A087WYY6  Q9Y3B4  Q9Y2S6  P0DML3  Q5D862  P52597  O43181  Q674X7  P69891  A0A087WY55  Q9NPF5  G8JLG2  P23497  Q8IWK6  P98088  F2Z2R4  Q6KB66  Q8TF72  E7ENN3  C9J084  Q3KNS1  A0A087WTG3  Q15031  Q00534  J3KSD8  A0A087WZW8  H3BTK5  P19525  F8VRZ8  P00367  Q6BEB4  Q02224  Q68DL7  P46459  Q5T5S1  P15088  Q8NEL9  H7C4F4  E9PIU9  Q9ULT8  O95831  Q9P0W8  P32238  Q8IVF2  K7N7B3  P55327-6  Q14966  Q8TB22  Q96M42  A0A087WX59  H0Y7V8  Q8N841  H0YBE8  Q9P2D1  K7EJ96  J3KN16  O15457  H7BZY4  Q53QZ3  Q8N1L9  E7EQV9  Q9NRX4  H3BPE9  O94964  Q8NCU1  Q86YF9  A0A087X236  Q5TBA9  Q69YZ2  Q9BXX3  A0A087WTD7  Q8IYD8  H7C276  A2RUG3  Q9ULJ8  Q6N022  Q86WS4  B4DEW2  Q9UIG0  B1ALM3  H3BSV5  Q9NS28  P05387  J3KNU1  A0A087X072  Q9BXB7  Q9UBD9  E7EQ64  Q8IYE1  P24539  O94812  A2A3C6  P40306  Q15828 | Elongation factor 1-alpha 2 OS=Homo sapiens GN=EEF1A2 PE=1 SV=1  Tubulin alpha-3E chain OS=Homo sapiens GN=TUBA3E PE=1 SV=2  Ubiquitin-40S ribosomal protein S27a OS=Homo sapiens GN=RPS27A PE=1 SV=2  Interleukin enhancer-binding factor 2 OS=Homo sapiens GN=ILF2 PE=2 SV=1  Heterogeneous nuclear ribonucleoproteins C1/C2 OS=Homo sapiens GN=HNRNPC  Isoform 5 of Microtubule-associated protein 4 OS=Homo sapiens GN=MAP4  Nucleolin OS=Homo sapiens GN=NCL PE=1 SV=3  Histone H2AX OS=Homo sapiens GN=H2AFX PE=1 SV=2  Keratin, type I cytoskeletal 20 OS=Homo sapiens GN=KRT20 PE=1 SV=1  Nuclear ubiquitous casein and cyclin-dependent kinase substrate 1 OS=Homo sapiens  60S ribosomal protein L11 OS=Homo sapiens GN=RPL11 PE=1 SV=2  Clusterin beta chain (Fragment) OS=Homo sapiens GN=CLU PE=4 SV=1  40S ribosomal protein S12 OS=Homo sapiens GN=RPS12 PE=1 SV=3  Tenascin OS=Homo sapiens GN=TNC PE=1 SV=1  X antigen family member 1 OS=Homo sapiens GN=XAGE1A PE=2 SV=3  Insulin-like growth factor 2 mRNA-binding protein 2 OS=Homo sapiens GN=IGF2BP2 PE=1  Desmoglein-1 OS=Homo sapiens GN=DSG1 PE=1 SV=2  Eukaryotic translation initiation factor 3 subunit A OS=Homo sapiens GN=EIF3A PE=1 SV=1  Fructose-bisphosphate aldolase A OS=Homo sapiens GN=ALDOA PE=1 SV=2  Alpha-1-antitrypsin OS=Homo sapiens GN=SERPINA1 PE=1 SV=3  L-lactate dehydrogenase A chain OS=Homo sapiens GN=LDHA PE=1 SV=2  Cystatin-A OS=Homo sapiens GN=CSTA PE=1 SV=1  Plakophilin-1 OS=Homo sapiens GN=PKP1 PE=4 SV=1  Splicing factor 3B subunit 6 OS=Homo sapiens GN=SF3B6 PE=1 SV=1  Translation machinery-associated protein 7 OS=Homo sapiens GN=TMA7 PE=1 SV=1  Chorionic somatomammotropin hormone 2 OS=Homo sapiens GN=CSH2 PE=1 SV=1  Filaggrin-2 OS=Homo sapiens GN=FLG2 PE=1 SV=1  Heterogeneous nuclear ribonucleoprotein F OS=Homo sapiens GN=HNRNPF PE=1 SV=3  NADH dehydrogenase [ubiquinone] iron-sulfur protein 4, mitochondrial OS=Homo sapiens  Kazrin OS=Homo sapiens GN=KAZN PE=1 SV=2  Hemoglobin subunit gamma-1 OS=Homo sapiens GN=HBG1 PE=1 SV=2  Chromosome 6 open reading frame 55, isoform CRA_b OS=Homo sapiens GN=VTA1 PE=4  DNA methyltransferase 1-associated protein 1 OS=Homo sapiens GN=DMAP1 PE=1 SV=1  Corneodesmosin OS=Homo sapiens GN=CDSN PE=4 SV=1  Nuclear autoantigen Sp-100 OS=Homo sapiens GN=SP100 PE=1 SV=3  Probable G-protein coupled receptor 125 OS=Homo sapiens GN=GPR125 PE=1 SV=2  Mucin-5AC (Fragments) OS=Homo sapiens GN=MUC5AC PE=1 SV=3  DNA excision repair protein ERCC-6-like 2 OS=Homo sapiens GN=ERCC6L2 PE=4 SV=1  Keratin, type II cytoskeletal 80 OS=Homo sapiens GN=KRT80 PE=1 SV=2  Protein Shroom3 OS=Homo sapiens GN=SHROOM3 PE=1 SV=2  Nesprin-1 OS=Homo sapiens GN=SYNE1 PE=1 SV=2  Tripartite motif-containing protein 2 (Fragment) OS=Homo sapiens GN=TRIM2 PE=4 SV=1  Patched domain-containing protein 3 OS=Homo sapiens GN=PTCHD3 PE=1 SV=3  Cullin-3 OS=Homo sapiens GN=CUL3 PE=4 SV=1  Probable leucine--tRNA ligase, mitochondrial OS=Homo sapiens GN=LARS2 PE=1 SV=2  Cyclin-dependent kinase 6 OS=Homo sapiens GN=CDK6 PE=1 SV=1  Bleomycin hydrolase (Fragment) OS=Homo sapiens GN=BLMH PE=1 SV=3  Protein IGKV3-11 OS=Homo sapiens GN=IGKV3-11 PE=4 SV=1  Sentrin-specific protease 8 (Fragment) OS=Homo sapiens GN=SENP8 PE=1 SV=1  Interferon-induced, double-stranded RNA-activated protein kinase OS=Homo sapiens  Sentrin-specific protease 1 (Fragment) OS=Homo sapiens GN=SENP1 PE=4 SV=1  Glutamate dehydrogenase 1, mitochondrial OS=Homo sapiens GN=GLUD1 PE=1 SV=2  Transcription factor Sp5 OS=Homo sapiens GN=SP5 PE=2 SV=1  Centromere-associated protein E OS=Homo sapiens GN=CENPE PE=1 SV=2  Uncharacterized protein C18orf63 OS=Homo sapiens GN=C18orf63 PE=2 SV=2  Vesicle-fusing ATPase OS=Homo sapiens GN=NSF PE=1 SV=3  Coiled-coil domain-containing protein 183 OS=Homo sapiens GN=CCDC183 PE=2 SV=3  Mast cell carboxypeptidase A OS=Homo sapiens GN=CPA3 PE=1 SV=2  Phospholipase DDHD1 OS=Homo sapiens GN=DDHD1 PE=1 SV=2  Major facilitator superfamily domain-containing protein 1 (Fragment) OS=Homo sapiens  Solute carrier organic anion transporter family member 2B1 (Fragment) OS=Homo sapiens  E3 ubiquitin-protein ligase HECTD1 OS=Homo sapiens GN=HECTD1 PE=1 SV=3  Apoptosis-inducing factor 1, mitochondrial OS=Homo sapiens GN=AIFM1 PE=1 SV=1  Spermatogenesis-associated protein 7 OS=Homo sapiens GN=SPATA7 PE=2 SV=3  Cholecystokinin receptor type A OS=Homo sapiens GN=CCKAR PE=1 SV=1  Protein AHNAK2 OS=Homo sapiens GN=AHNAK2 PE=1 SV=2  Synaptonemal complex protein 2-like OS=Homo sapiens GN=SYCP2L PE=4 SV=1  Isoform 6 of Tumor protein D52 OS=Homo sapiens GN=TPD52  Zinc finger protein 638 OS=Homo sapiens GN=ZNF638 PE=1 SV=2  Spermatogenesis-associated protein 20 OS=Homo sapiens GN=SPATA20 PE=2 SV=3  Putative uncharacterized protein encoded by LINC00479 OS=Homo sapiens GN=LINC00479  Proteasomal ubiquitin receptor ADRM1 OS=Homo sapiens GN=ADRM1 PE=4 SV=1  Serine/threonine-protein kinase MRCK alpha (Fragment) OS=Homo sapiens GN=CDC42BPA  Tubulin polyglutamylase TTLL6 OS=Homo sapiens GN=TTLL6 PE=1 SV=2  Protein KIBRA (Fragment) OS=Homo sapiens GN=WWC1 PE=1 SV=1  Chromodomain-helicase-DNA-binding protein 7 OS=Homo sapiens GN=CHD7 PE=1 SV=3  Protein rogdi homolog (Fragment) OS=Homo sapiens GN=ROGDI PE=4 SV=1  Proteasome-associated protein ECM29 homolog OS=Homo sapiens GN=KIAA0368 PE=1 SV=1  MutS protein homolog 4 OS=Homo sapiens GN=MSH4 PE=1 SV=2  Tubulin polyglutamylase TTLL4 (Fragment) OS=Homo sapiens GN=TTLL4 PE=1 SV=3  Rho GTPase-activating protein 15 OS=Homo sapiens GN=ARHGAP15 PE=1 SV=2  Basic leucine zipper transcriptional factor ATF-like 2 OS=Homo sapiens GN=BATF2 PE=1 SV=1  Ribosomal protein L15 (Fragment) OS=Homo sapiens GN=RPL15 PE=1 SV=1  14 kDa phosphohistidine phosphatase OS=Homo sapiens GN=PHPT1 PE=1 SV=1  Methyltransferase-like protein 9 (Fragment) OS=Homo sapiens GN=METTL9 PE=4 SV=1  Protein SOGA1 OS=Homo sapiens GN=SOGA1 PE=1 SV=2  Putative uncharacterized protein encoded by LINC00521 OS=Homo sapiens GN=LINC00521  Zinc finger protein DZIP1 OS=Homo sapiens GN=DZIP1 PE=1 SV=1  Double zinc ribbon and ankyrin repeat-containing protein 1 (Fragment) OS=Homo sapiens  Protein furry homolog OS=Homo sapiens GN=FRY PE=1 SV=1  Transmembrane protein 200B OS=Homo sapiens GN=TMEM200B PE=2 SV=1  Ankyrin repeat domain-containing protein 30A OS=Homo sapiens GN=ANKRD30A PE=1 SV=3  A-kinase anchor protein 13 OS=Homo sapiens GN=AKAP13 PE=4 SV=1  Fanconi anemia group M protein OS=Homo sapiens GN=FANCM PE=1 SV=2  Phosphoinositide phospholipase C (Fragment) OS=Homo sapiens GN=PLCL2 PE=1 SV=1  Testis-specific XK-related protein, Y-linked 2 OS=Homo sapiens GN=XKRY2 PE=2 SV=2  Neurabin-1 OS=Homo sapiens GN=PPP1R9A PE=1 SV=2  Teneurin-4 OS=Homo sapiens GN=TENM4 PE=1 SV=2  Uncharacterized protein C12orf40 OS=Homo sapiens GN=C12orf40 PE=2 SV=3  Mitogen-activated protein kinase 4 OS=Homo sapiens GN=MAPK4 PE=2 SV=1  Tyrosine-protein kinase BAZ1B OS=Homo sapiens GN=BAZ1B PE=1 SV=2  Voltage-dependent L-type calcium channel subunit alpha-1S OS=Homo sapiens  Protein FAM65A (Fragment) OS=Homo sapiens GN=FAM65A PE=1 SV=1  Regulator of G-protein signaling 18 OS=Homo sapiens GN=RGS18 PE=1 SV=1  60S acidic ribosomal protein P2 OS=Homo sapiens GN=RPLP2 PE=1 SV=1  Cation channel sperm-associated protein 4 (Fragment) OS=Homo sapiens GN=CATSPER4  ATP-dependent DNA helicase Q4 OS=Homo sapiens GN=RECQL4 PE=4 SV=1  Spermatogenesis-associated protein 16 OS=Homo sapiens GN=SPATA16 PE=1 SV=3  Cardiotrophin-like cytokine factor 1 OS=Homo sapiens GN=CLCF1 PE=1 SV=1  Trypsin-1 OS=Homo sapiens GN=PRSS1 PE=3 SV=1  Coiled-coil domain-containing protein 13 OS=Homo sapiens GN=CCDC13 PE=2 SV=2  ATP synthase F(0) complex subunit B1, mitochondrial OS=Homo sapiens GN=ATP5F1 PE=1  BAI1-associated protein 3 OS=Homo sapiens GN=BAIAP3 PE=1 SV=2  Brain-specific angiogenesis inhibitor 2 OS=Homo sapiens GN=BAI2 PE=4 SV=1  Proteasome subunit beta type-10 OS=Homo sapiens GN=PSMB10 PE=1 SV=1  Cystatin-M OS=Homo sapiens GN=CST6 PE=1 SV=1 |
|  | |
| **24 hr radiated_unradiated control- Upregulated** | |
| **Accession** | **Description** |
| P02533  P08779  P04259  Q04695  P80723  P27816-5  Q15323  O76013  P81605  P06702  Q9Y6M1  F8VV32  P29508  P12235  P31151  P25311  P31025  P84090  C9J0E4  A0A087WYY6  Q9Y3B4  Q09666  P49458  P31944  E7EQB2  D6R9W4  Q674X7  P69905  Q9NPF5  P04279  P27482  A8MU27  C9JA05  P31947  Q8IWK6  Q8N241  P98088  Q14533  C9J084  Q3KNS1  Q15031  P62995  P05023  Q32MZ4-4  P19525  Q9UGM3  Q9NZT1  Q6VY07  Q96IX5  E9PNJ4  E9PIU9  H0YJB9  P30044  H0YD31  O75342  Q9P0W8  Q96FJ2  Q9GZZ8  Q8N841  Q53QZ3  B5MDQ6  P08240  Q96JP9-2  A0A087WTV1  Q8WVV4-1  P56385  Q9NS28  P05387  I3L1Q8  P20042  Q15828 | Keratin, type I cytoskeletal 14 OS=Homo sapiens GN=KRT14 PE=1 SV=4  Keratin, type I cytoskeletal 16 OS=Homo sapiens GN=KRT16 PE=1 SV=4  Keratin, type II cytoskeletal 6B OS=Homo sapiens GN=KRT6B PE=1 SV=5  Keratin, type I cytoskeletal 17 OS=Homo sapiens GN=KRT17 PE=1 SV=2  Brain acid soluble protein 1 OS=Homo sapiens GN=BASP1 PE=1 SV=2  Isoform 5 of Microtubule-associated protein 4 OS=Homo sapiens GN=MAP4  Keratin, type I cuticular Ha1 OS=Homo sapiens GN=KRT31 PE=2 SV=3  Keratin, type I cuticular Ha6 OS=Homo sapiens GN=KRT36 PE=1 SV=1  Dermcidin OS=Homo sapiens GN=DCD PE=1 SV=2  Protein S100-A9 OS=Homo sapiens GN=S100A9 PE=1 SV=1  Insulin-like growth factor 2 mRNA-binding protein 2 OS=Homo sapiens GN=IGF2BP2 PE=1  Lysozyme C OS=Homo sapiens GN=LYZ PE=1 SV=1  Serpin B3 OS=Homo sapiens GN=SERPINB3 PE=1 SV=2  ADP/ATP translocase 1 OS=Homo sapiens GN=SLC25A4 PE=1 SV=4  Protein S100-A7 OS=Homo sapiens GN=S100A7 PE=1 SV=4  Zinc-alpha-2-glycoprotein OS=Homo sapiens GN=AZGP1 PE=1 SV=2  Lipocalin-1 OS=Homo sapiens GN=LCN1 PE=1 SV=1  Enhancer of rudimentary homolog OS=Homo sapiens GN=ERH PE=1 SV=1  Cystatin-A OS=Homo sapiens GN=CSTA PE=1 SV=1  Plakophilin-1 OS=Homo sapiens GN=PKP1 PE=4 SV=1  Splicing factor 3B subunit 6 OS=Homo sapiens GN=SF3B6 PE=1 SV=1  Neuroblast differentiation-associated protein AHNAK OS=Homo sapiens GN=AHNAK PE=1  Signal recognition particle 9 kDa protein OS=Homo sapiens GN=SRP9 PE=1 SV=2  Caspase-14 OS=Homo sapiens GN=CASP14 PE=1 SV=2  Lactotransferrin (Fragment) OS=Homo sapiens GN=LTF PE=1 SV=1  Drebrin (Fragment) OS=Homo sapiens GN=DBN1 PE=1 SV=1  Kazrin OS=Homo sapiens GN=KAZN PE=1 SV=2  Hemoglobin subunit alpha OS=Homo sapiens GN=HBA1 PE=1 SV=2  DNA methyltransferase 1-associated protein 1 OS=Homo sapiens GN=DMAP1 PE=1 SV=1  Semenogelin-1 OS=Homo sapiens GN=SEMG1 PE=1 SV=2  Calmodulin-like protein 3 OS=Homo sapiens GN=CALML3 PE=1 SV=2  Small ubiquitin-related modifier 3 OS=Homo sapiens GN=SUMO3 PE=1 SV=1  Immunoglobulin J chain (Fragment) OS=Homo sapiens GN=IGJ PE=1 SV=1  14-3-3 protein sigma OS=Homo sapiens GN=SFN PE=1 SV=1  Probable G-protein coupled receptor 125 OS=Homo sapiens GN=GPR125 PE=1 SV=2  Heat shock 27kDa protein family, member 7 (Cardiovascular), isoform CRA_c  Mucin-5AC (Fragments) OS=Homo sapiens GN=MUC5AC PE=1 SV=3  Keratin, type II cuticular Hb1 OS=Homo sapiens GN=KRT81 PE=1 SV=3  Tripartite motif-containing protein 2 (Fragment) OS=Homo sapiens GN=TRIM2 PE=4 SV=1  Patched domain-containing protein 3 OS=Homo sapiens GN=PTCHD3 PE=1 SV=3  Probable leucine--tRNA ligase, mitochondrial OS=Homo sapiens GN=LARS2 PE=1 SV=2  Transformer-2 protein homolog beta OS=Homo sapiens GN=TRA2B PE=1 SV=1  Sodium/potassium-transporting ATPase subunit alpha-1 OS=Homo sapiens GN=ATP1A1 PE=1  Isoform 4 of Leucine-rich repeat flightless-interacting protein 1 OS=Homo sapiens  Interferon-induced, double-stranded RNA-activated protein kinase OS=Homo sapiens  Deleted in malignant brain tumors 1 protein OS=Homo sapiens GN=DMBT1 PE=1 SV=2  Calmodulin-like protein 5 OS=Homo sapiens GN=CALML5 PE=1 SV=2  Phosphofurin acidic cluster sorting protein 1 OS=Homo sapiens GN=PACS1 PE=1 SV=2  Up-regulated during skeletal muscle growth protein 5 OS=Homo sapiens GN=USMG5 PE=1  Stromal interaction molecule 1 OS=Homo sapiens GN=STIM1 PE=1 SV=1  Solute carrier organic anion transporter family member 2B1 (Fragment) OS=Homo sapiens  UPF0568 protein C14orf166 (Fragment) OS=Homo sapiens GN=C14orf166 PE=1 SV=1  Peroxiredoxin-5, mitochondrial OS=Homo sapiens GN=PRDX5 PE=1 SV=4  Ras-related protein Rab-2A (Fragment) OS=Homo sapiens GN=RAB2A PE=1 SV=1  Arachidonate 12-lipoxygenase, 12R-type OS=Homo sapiens GN=ALOX12B PE=1 SV=1  Spermatogenesis-associated protein 7 OS=Homo sapiens GN=SPATA7 PE=2 SV=3  Dynein light chain 2, cytoplasmic OS=Homo sapiens GN=DYNLL2 PE=1 SV=1  Extracellular glycoprotein lacritin OS=Homo sapiens GN=LACRT PE=1 SV=1  Tubulin polyglutamylase TTLL6 OS=Homo sapiens GN=TTLL6 PE=1 SV=2  Rho GTPase-activating protein 15 OS=Homo sapiens GN=ARHGAP15 PE=1 SV=2  Zinc finger protein 74 OS=Homo sapiens GN=ZNF74 PE=4 SV=1  Signal recognition particle receptor subunit alpha OS=Homo sapiens GN=SRPR PE=1 SV=2  Isoform 2 of Cadherin-related family member 1 OS=Homo sapiens GN=CDHR1  Oxysterol-binding protein-related protein 2 (Fragment) OS=Homo sapiens GN=OSBPL2 PE=4  Isoform 1 of Protein POF1B OS=Homo sapiens GN=POF1B  ATP synthase subunit e, mitochondrial OS=Homo sapiens GN=ATP5I PE=1 SV=2  Regulator of G-protein signaling 18 OS=Homo sapiens GN=RGS18 PE=1 SV=1  60S acidic ribosomal protein P2 OS=Homo sapiens GN=RPLP2 PE=1 SV=1  Zinc finger ZZ-type and EF-hand domain-containing protein 1 (Fragment) OS=Homo sapiens  Eukaryotic translation initiation factor 2 subunit 2 OS=Homo sapiens GN=EIF2S2 PE=1 SV=2  Cystatin-M OS=Homo sapiens GN=CST6 PE=1 SV=1 |

| **2 hr radiated_unradiated control - Downregulated** | |
| --- | --- |
| **Accession** | **Description** |
| Q9Y3E1  P13639  F8W6I7  Q7Z7K6  E9PI21  Q15147  Q71UM5  Q96QC0  Q9UHE5  M0R334  C9K0D5  E5RH60  P21817  H0YA87  Q8WWQ0  H0YA27  Q03468  Q9BTV7  Q17RY0  P60509  Q8N122  A0A087WXX9 | Hepatoma-derived growth factor-related protein 3 OS=Homo sapiens GN=HDGFRP3 PE=1  Elongation factor 2 OS=Homo sapiens GN=EEF2 PE=1 SV=4  Heterogeneous nuclear ribonucleoprotein A1 OS=Homo sapiens GN=HNRNPA1 PE=1 SV=2  Centromere protein V OS=Homo sapiens GN=CENPV PE=1 SV=1  Estradiol 17-beta-dehydrogenase 12 (Fragment) OS=Homo sapiens GN=HSD17B12 PE=1  1-phosphatidylinositol 4,5-bisphosphate phosphodiesterase beta-4 OS=Homo sapiens  40S ribosomal protein S27-like OS=Homo sapiens GN=RPS27L PE=1 SV=3  Serine/threonine-protein phosphatase 1 regulatory subunit 10 OS=Homo sapiens  N-acetyltransferase 8 OS=Homo sapiens GN=NAT8 PE=1 SV=2  Dipeptidyl peptidase 9 (Fragment) OS=Homo sapiens GN=DPP9 PE=4 SV=1  Kinesin light chain 4 (Fragment) OS=Homo sapiens GN=KLC4 PE=1 SV=3  Uncharacterized protein C8orf46 OS=Homo sapiens GN=C8orf46 PE=4 SV=1  Ryanodine receptor 1 OS=Homo sapiens GN=RYR1 PE=1 SV=3  PACRG-like protein (Fragment) OS=Homo sapiens GN=PACRGL PE=4 SV=1  PH-interacting protein OS=Homo sapiens GN=PHIP PE=1 SV=2  Cyclin-I (Fragment) OS=Homo sapiens GN=CCNI PE=4 SV=1  DNA excision repair protein ERCC-6 OS=Homo sapiens GN=ERCC6 PE=1 SV=1  CDK5 and ABL1 enzyme substrate 2 OS=Homo sapiens GN=CABLES2 PE=1 SV=3  Cytoplasmic polyadenylation element-binding protein 4 OS=Homo sapiens GN=CPEB4 PE=1  Endogenous retrovirus group PABLB member 1 Env polyprotein OS=Homo sapiens  Regulatory-associated protein of mTOR OS=Homo sapiens GN=RPTOR PE=1 SV=1  5'-AMP-activated protein kinase catalytic subunit alpha-2 OS=Homo sapiens GN=PRKAA2 |
|  |  |
| **24hr radiated_unradiated control - Downregulated** | |
| **Accession** | **Description** |
| Q16777  Q92922  P11233  P13639  O76094  P51991-2  P06748  E7ENQ1  F8VZX2  B4DUR8  Q13151  Q86YZ3  P05388  P05204  B8ZZQ6  Q13017  F8VU11  Q15651  P53597  F8W6P5  E9PNS6  O95864  P15531  A0A087WWI4  P61158  Q9NRW1  B4DS61  J9JID7  P51858  E9PLD3  H3BS42  H7C1C8  Q15147  H0YDV3  Q9NYB9  Q8WXG9  Q96CT7  D3YTB1  M0QZN1  P26196  H3BMM9  P08758  J3KMW3  H3BPX2  Q9UPY6  B0QY34  Q6YP21  P00558  Q9NXF1  F8W0A0  H7BZ42  Q68DL7  Q9UHE5  Q9UQ03  F8VR42  A0A087WXZ3  Q9Y3F4  M0R334  F8WEF5  H0Y512  J3KPD3  Q86U70  H7BZ48  F2Z393  Q5W011  H0Y7G9  A0A087WUZ8  G3V4W4  P12525  P21817  K7EJ96  Q8TBY0  H0Y4R1  Q03468  Q96AE4  D3DTX6  P60509  H0YBI9  O60306  M0QYS3  Q9H0V9  Q86UQ4  A0A087WUD2 | Histone H2A type 2-C OS=Homo sapiens GN=HIST2H2AC PE=1 SV=4  SWI/SNF complex subunit SMARCC1 OS=Homo sapiens GN=SMARCC1 PE=1 SV=3  Ras-related protein Ral-A OS=Homo sapiens GN=RALA PE=1 SV=1  Elongation factor 2 OS=Homo sapiens GN=EEF2 PE=1 SV=4  Signal recognition particle subunit SRP72 OS=Homo sapiens GN=SRP72 PE=1 SV=3  Isoform 2 of Heterogeneous nuclear ribonucleoprotein A3 OS=Homo sapiens GN=HNRNPA3  Nucleophosmin OS=Homo sapiens GN=NPM1 PE=1 SV=2  Mitogen-activated protein kinase kinase kinase kinase 4 OS=Homo sapiens GN=MAP4K4  Poly(rC)-binding protein 2 OS=Homo sapiens GN=PCBP2 PE=1 SV=1  T-complex protein 1 subunit gamma OS=Homo sapiens GN=CCT3 PE=1 SV=1  Heterogeneous nuclear ribonucleoprotein A0 OS=Homo sapiens GN=HNRNPA0 PE=1 SV=1  Hornerin OS=Homo sapiens GN=HRNR PE=1 SV=2  60S acidic ribosomal protein P0 OS=Homo sapiens GN=RPLP0 PE=1 SV=1  Non-histone chromosomal protein HMG-17 OS=Homo sapiens GN=HMGN2 PE=1 SV=3  Uncharacterized protein OS=Homo sapiens GN=PTMA PE=1 SV=1  Rho GTPase-activating protein 5 OS=Homo sapiens GN=ARHGAP5 PE=1 SV=2  PRP40 pre-mRNA processing factor 40 homolog B (Yeast), isoform CRA_a OS=Homo sapiens  High mobility group nucleosome-binding domain-containing protein 3 OS=Homo sapiens  Succinyl-CoA ligase [ADP/GDP-forming] subunit alpha, mitochondrial OS=Homo sapiens  LVV-hemorphin-7 (Fragment) OS=Homo sapiens GN=HBB PE=1 SV=1  Histone-binding protein RBBP4 OS=Homo sapiens GN=RBBP4 PE=1 SV=1  Fatty acid desaturase 2 OS=Homo sapiens GN=FADS2 PE=1 SV=1  Nucleoside diphosphate kinase A OS=Homo sapiens GN=NME1 PE=1 SV=1  Hypoxia up-regulated protein 1 OS=Homo sapiens GN=HYOU1 PE=4 SV=1  Actin-related protein 3 OS=Homo sapiens GN=ACTR3 PE=1 SV=3  Ras-related protein Rab-6B OS=Homo sapiens GN=RAB6B PE=1 SV=1  SFRS protein kinase 1, isoform CRA_f OS=Homo sapiens GN=SRPK1 PE=1 SV=1  Lamin B2, isoform CRA_a OS=Homo sapiens GN=LMNB2 PE=1 SV=1  Hepatoma-derived growth factor OS=Homo sapiens GN=HDGF PE=1 SV=1  Uncharacterized protein OS=Homo sapiens PE=4 SV=1  Zinc finger protein 768 OS=Homo sapiens GN=ZNF768 PE=1 SV=2  Coiled-coil domain-containing protein 74B (Fragment) OS=Homo sapiens GN=CCDC74B  1-phosphatidylinositol 4,5-bisphosphate phosphodiesterase beta-4 OS=Homo sapiens  Coiled-coil domain-containing protein 83 (Fragment) OS=Homo sapiens GN=CCDC83 PE=4  Abl interactor 2 OS=Homo sapiens GN=ABI2 PE=1 SV=1  G-protein coupled receptor 98 OS=Homo sapiens GN=GPR98 PE=1 SV=2  Coiled-coil domain-containing protein 124 OS=Homo sapiens GN=CCDC124 PE=1 SV=1  60S ribosomal protein L32 (Fragment) OS=Homo sapiens GN=RPL32 PE=1 SV=1  Histone H2AX (Fragment) OS=Homo sapiens GN=H2AFX PE=4 SV=1  Probable ATP-dependent RNA helicase DDX6 OS=Homo sapiens GN=DDX6 PE=1 SV=2  RNA-binding protein with serine-rich domain 1 (Fragment) OS=Homo sapiens GN=RNPS1  Annexin A5 OS=Homo sapiens GN=ANXA5 PE=1 SV=2  Peptidyl-prolyl cis-trans isomerase NIMA-interacting 4 OS=Homo sapiens GN=PIN4 PE=1  Obscurin OS=Homo sapiens GN=OBSCN PE=4 SV=2  Wiskott-Aldrich syndrome protein family member 3 OS=Homo sapiens GN=WASF3 PE=1  Casein kinase I isoform epsilon OS=Homo sapiens GN=CSNK1E PE=3 SV=1  Kynurenine--oxoglutarate transaminase 3 OS=Homo sapiens GN=CCBL2 PE=1 SV=1  Phosphoglycerate kinase 1 OS=Homo sapiens GN=PGK1 PE=1 SV=3  Testis-expressed sequence 10 protein OS=Homo sapiens GN=TEX10 PE=1 SV=2  Phenylalanine-4-hydroxylase (Fragment) OS=Homo sapiens GN=PAH PE=4 SV=1  Interleukin-23 receptor (Fragment) OS=Homo sapiens GN=IL23R PE=4 SV=1  Uncharacterized protein C18orf63 OS=Homo sapiens GN=C18orf63 PE=2 SV=2  N-acetyltransferase 8 OS=Homo sapiens GN=NAT8 PE=1 SV=2  Coronin-2B OS=Homo sapiens GN=CORO2B PE=2 SV=4  Coiled-coil domain-containing protein 65 (Fragment) OS=Homo sapiens GN=CCDC65 PE=4  YTH domain-containing family protein 2 OS=Homo sapiens GN=YTHDF2 PE=4 SV=1  Serine-threonine kinase receptor-associated protein OS=Homo sapiens GN=STRAP PE=1  Dipeptidyl peptidase 9 (Fragment) OS=Homo sapiens GN=DPP9 PE=4 SV=1  PHD and RING finger domain-containing protein 1 OS=Homo sapiens GN=PHRF1 PE=1 SV=1  Adipocyte plasma membrane-associated protein (Fragment) OS=Homo sapiens GN=APMAP  RNA binding motif protein 7, isoform CRA_c OS=Homo sapiens GN=RBM7 PE=1 SV=1  LIM domain-binding protein 1 OS=Homo sapiens GN=LDB1 PE=1 SV=2  RANBP2-like and GRIP domain-containing protein 5/6 (Fragment) OS=Homo sapiens  Transaldolase OS=Homo sapiens GN=TALDO1 PE=1 SV=1  Splicing factor 45 (Fragment) OS=Homo sapiens GN=RBM17 PE=1 SV=1  Serine protease HTRA1 (Fragment) OS=Homo sapiens GN=HTRA1 PE=4 SV=1  28S ribosomal protein S34, mitochondrial OS=Homo sapiens GN=MRPS34 PE=4 SV=1  Glucosamine 6-phosphate N-acetyltransferase (Fragment) OS=Homo sapiens GN=GNPNAT1  Putative myc-like protein MYCLP1 OS=Homo sapiens GN=MYCLP1 PE=5 SV=2  Ryanodine receptor 1 OS=Homo sapiens GN=RYR1 PE=1 SV=3  Protein rogdi homolog (Fragment) OS=Homo sapiens GN=ROGDI PE=4 SV=1  Probable RNA-binding protein 46 OS=Homo sapiens GN=RBM46 PE=2 SV=1  Inosine-5'-monophosphate dehydrogenase 2 (Fragment) OS=Homo sapiens GN=IMPDH2  DNA excision repair protein ERCC-6 OS=Homo sapiens GN=ERCC6 PE=1 SV=1  Far upstream element-binding protein 1 OS=Homo sapiens GN=FUBP1 PE=1 SV=3  Neurabin-2 OS=Homo sapiens GN=PPP1R9B PE=4 SV=1  Endogenous retrovirus group PABLB member 1 Env polyprotein OS=Homo sapiens  Protein MTO1 homolog, mitochondrial (Fragment) OS=Homo sapiens GN=MTO1 PE=4 SV=1  Intron-binding protein aquarius OS=Homo sapiens GN=AQR PE=1 SV=4  Rho guanine nucleotide exchange factor 1 (Fragment) OS=Homo sapiens GN=ARHGEF1 PE=1  VIP36-like protein OS=Homo sapiens GN=LMAN2L PE=1 SV=1  ATP-binding cassette sub-family A member 13 OS=Homo sapiens GN=ABCA13 PE=2 SV=3  Enhancer of filamentation 1 OS=Homo sapiens GN=NEDD9 PE=4 SV=1 |
